# Supplementary material for: Leisure-time physical activity, sedentary behaviors, sleep, and cardiometabolic risk factors at baseline in the PREDIMED-PLUS intervention trial: A cross-sectional analysis
Source: PubMed Central journal article supplement (PMC5342184; doi:10.1371/journal.pone.0172253), 2017-03-08
Supplement: pone.0172253.s002.pdf [file pone.0172253.s002.pdf]

**S1 Table 1. Multivariable-adjusted RR (95% CI) for obesity<sup>a</sup> per 60-min/day substitution in sleeping, watching TV and PA**

| <b>Substitution Model</b><br>(Substitution of 60 min/day of an activity to replace 60 min/day for one of the remaining activities) | <b>Sleeping</b>     | <b>TV-watching</b>  | <b>Light PA<sup>b</sup></b> | <b>Moderate-vigorous PA<sup>b</sup></b> | <b>Total discretionary time<sup>c</sup></b> |
|------------------------------------------------------------------------------------------------------------------------------------|---------------------|---------------------|-----------------------------|-----------------------------------------|---------------------------------------------|
| <b>Substitution model A :<br/>Sleeping is dropped</b>                                                                              |                     |                     |                             |                                         |                                             |
| Crude model                                                                                                                        | Dropped             | 1.03 (1.02, 1.04)** | 0.98 (0.95, 1.01)           | 0.95 (0.92, 0.98)**                     | 1.00 (0.99, 1.01)                           |
| Multivariable model <sup>d</sup>                                                                                                   | Dropped             | 1.03 (1.01, 1.05)** | 0.98 (0.95, 1.01)           | 0.95 (0.93, 0.97)**                     | 1.00 (0.99, 1.01)                           |
| <b>Substitution model B :<br/>TV-Watching is dropped</b>                                                                           |                     |                     |                             |                                         |                                             |
| Crude model                                                                                                                        | 0.97 (0.96, 0.98)** | Dropped             | 0.95 (0.92, 0.98)**         | 0.92 (0.90, 0.94)**                     | 1.02 (1.01, 1.03)**                         |
| Multivariable model <sup>d</sup>                                                                                                   | 0.97 (0.96, 0.98)** | Dropped             | 0.95 (0.92, 0.98)*          | 0.92 (0.90, 0.94)**                     | 1.03 (1.02, 1.04)**                         |
| <b>Substitution model C :<br/>Light PA is dropped</b>                                                                              |                     |                     |                             |                                         |                                             |
| Crude model                                                                                                                        | 1.02 (0.99, 1.05)   | 1.05 (1.02, 1.08)** | Dropped                     | 0.97 (0.93, 1.01)                       | 0.98 (0.95, 1.01)                           |
| Multivariable model <sup>d</sup>                                                                                                   | 1.02 (0.99, 1.05)   | 1.05 (1.02, 1.08)** | Dropped                     | 0.96 (0.93, 0.99)*                      | 0.98 (0.95, 1.01)                           |
| <b>Substitution model D:<br/>Moderate-vigorous PA is dropped</b>                                                                   |                     |                     |                             |                                         |                                             |
| Crude model                                                                                                                        | 1.05 (1.02, 1.08)** | 1.09 (1.06, 1.12)** | 1.03 (0.99, 1.07)           | Dropped                                 | 0.95 (0.93, 0.97)**                         |
| Multivariable model <sup>d</sup>                                                                                                   | 1.05 (1.02, 1.08)** | 1.08 (1.06, 1.10)** | 1.03 (0.99, 1.07)           | Dropped                                 | 0.95 (0.93, 0.97)**                         |

Abbreviations: CI, confidence interval; RR, Relative Risk; PA, physical activity. <sup>a</sup>Obesity is defined as BMI  $\geq 30$  kg/m<sup>2</sup>. <sup>b</sup>Light PA (<4.0 METs) includes leisurely stroll or walk. Moderate-vigorous PA ( $\geq 4.0$  METs) includes faster walking, cross country walking, stair climbing, working in the garden, guided exercises and outdoor sports or at home or at the gym. <sup>c</sup>Total discretionary time= sum of time spent in sleeping, TV-watching, light PA and moderate-vigorous PA. The coefficient for total discretionary time represents the omitted activity component (e.g. sleeping for substitution model A, TV-watching for substitution model B and so on). <sup>d</sup>Multivariable-adjusted model for age (continuous), gender, education level (illiterate/primary education, secondary education and academic/graduate), smoking status (never smoker, past smoker, current smoker), marital status (single/divorced, married and widower), familiar history of coronary heart disease (yes or no) and Mediterranean diet adherence (<8 or  $\geq 9$  items). All models were stratified by recruiting center. \* P<0.05, \*\* P<0.01. Additionally, the models were adjusted for type 2 diabetes and the Relative Risk remained unchanged.

**S1 Table 2. Multivariable-adjusted RR (95% CI) for diabetes per 60-min/day substitution in sleeping, watching TV and PA**

| <b>Substitution Model</b><br>(Substitution of 60 min/day of an activity to replace 60 min/day for one of the remaining activities) | <b>Sleeping</b>    | <b>TV-watching</b>  | <b>Light PA<sup>a</sup></b> | <b>Moderate-vigorous PA<sup>a</sup></b> | <b>Total discretionary time<sup>b</sup></b> |
|------------------------------------------------------------------------------------------------------------------------------------|--------------------|---------------------|-----------------------------|-----------------------------------------|---------------------------------------------|
| <b>Substitution model A :<br/>Sleeping is dropped</b>                                                                              |                    |                     |                             |                                         |                                             |
| Crude model                                                                                                                        | Dropped            | 1.05 (1.01, 1.09)*  | 1.05 (0.97, 1.13)           | 0.98 (0.93, 1.03)                       | 1.00 (0.97, 1.03)                           |
| Multivariable model <sup>c</sup>                                                                                                   | Dropped            | 1.05 (1.01, 1.09)*  | 1.03 (0.96, 1.10)           | 0.95 (0.89, 1.01)                       | 1.00 (0.96, 1.04)                           |
| <b>Substitution model B :<br/>TV-Watching is dropped</b>                                                                           |                    |                     |                             |                                         |                                             |
| Crude model                                                                                                                        | 0.95 (0.92, 0.98)* | Dropped             | 1.01 (0.94, 1.08)           | 0.94 (0.90, 0.98)**                     | 1.05 (1.03, 1.07)**                         |
| Multivariable model <sup>c</sup>                                                                                                   | 0.96 (0.93, 0.99)* | Dropped             | 1.00 (0.93, 1.07)           | 0.91 (0.86, 0.96)**                     | 1.04 (1.02, 1.06)**                         |
| <b>Substitution model C :<br/>Light PA is dropped</b>                                                                              |                    |                     |                             |                                         |                                             |
| Crude model                                                                                                                        | 0.95 (0.88, 1.02)  | 0.99 (0.92, 1.06)   | Dropped                     | 0.94 (0.86, 1.02)                       | 1.06 (0.99, 1.13)                           |
| Multivariable model <sup>c</sup>                                                                                                   | 0.97 (0.90, 1.04)  | 1.00 (0.93, 1.07)   | Dropped                     | 0.92 (0.85, 0.99)*                      | 1.05 (0.98, 1.12)                           |
| <b>Substitution model D:<br/>Moderate-vigorous PA is dropped</b>                                                                   |                    |                     |                             |                                         |                                             |
| Crude model                                                                                                                        | 1.02 (0.96, 1.08)  | 1.06 (1.01, 1.11)*  | 1.06 (0.98, 1.14)           | Dropped                                 | 0.98 (0.93, 1.03)                           |
| Multivariable model <sup>c</sup>                                                                                                   | 1.06 (1.00, 1.12)  | 1.11 (1.05, 1.17)** | 1.10 (1.02, 1.18)**         | Dropped                                 | 0.94 (0.89, 0.99)*                          |

Abbreviations: CI, confidence interval; RR, Relative Risk; PA, physical activity. <sup>a</sup>Light PA (<4.0 METs) includes leisurely stroll or walk. Moderate-vigorous PA (≥4.0 METs) includes faster walking, cross country walking, stair climbing, working in the garden, guided exercises and outdoor sports or at home or at the gym. <sup>b</sup>Total discretionary time= sum of time spent in sleeping, TV-watching, light PA and moderate-vigorous PA. The coefficient for total discretionary time represents the omitted activity component (e.g. sleeping for substitution model A, TV-watching for substitution model B and so on). <sup>c</sup>Multivariable-adjusted model for age (continuous), gender, education level (illiterate/primary education, secondary education and academic/graduate), smoking status (never smoker, past smoker, current smoker), marital status (single/divorced, married and widower), familiar history of coronary heart disease (yes or no) and Mediterranean diet adherence (<8 or ≥9 items). All models were stratified by recruiting center. \* P<0.05, \*\* P<0.01. Additionally, the models were adjusted for obesity and the Relative Risk remained unchanged.

**S1 Table 3. Multivariable-adjusted RR (95% CI) for abdominal obesity<sup>a</sup> per 60-min/day substitution in sleeping, watching TV and PA**

| <b>Substitution Model</b><br>(Substitution of 60 min/day of an activity to replace 60 min/day for one of the remaining activities) | <b>Sleeping</b>     | <b>TV-watching</b>  | <b>Light PA<sup>b</sup></b> | <b>Moderate-vigorous PA<sup>b</sup></b> | <b>Total discretionary time<sup>c</sup></b> |
|------------------------------------------------------------------------------------------------------------------------------------|---------------------|---------------------|-----------------------------|-----------------------------------------|---------------------------------------------|
| <b>Substitution model A :<br/>Sleeping is dropped</b>                                                                              |                     |                     |                             |                                         |                                             |
| Crude model                                                                                                                        | Dropped             | 1.01 (1.00, 1.02)*  | 1.00 (0.99, 1.01)           | 0.96 (0.95, 0.97)**                     | 1.00 (0.99, 1.01)                           |
| Multivariable model 1 <sup>d</sup>                                                                                                 | Dropped             | 1.00 (0.99, 1.01)   | 1.00 (0.98, 1.02)           | 0.97 (0.96, 0.98)**                     | 1.00 (0.99, 1.01)                           |
| Multivariable model 2 <sup>e</sup>                                                                                                 | Dropped             | 1.01 (0.99, 1.03)   | 1.01 (0.99, 1.03)           | 0.97 (0.96, 0.98)**                     | 1.01 (0.99, 1.01)                           |
| <b>Substitution model B :<br/>TV-Watching is dropped</b>                                                                           |                     |                     |                             |                                         |                                             |
| Crude model                                                                                                                        | 0.99 (0.98, 1.00)   | Dropped             | 0.99 (0.98, 1.00)           | 0.95 (0.94, 0.96)**                     | 1.01 (1.02, 1.03)**                         |
| Multivariable model 1 <sup>d</sup>                                                                                                 | 0.99 (0.98, 1.00)   | Dropped             | 0.99 (0.97, 1.01)           | 0.96 (0.95, 0.97)**                     | 1.01 (1.00, 1.02)**                         |
| Multivariable model 2 <sup>e</sup>                                                                                                 | 0.99 (0.98, 1.00)   | Dropped             | 0.99 (0.98, 1.00)           | 0.97 (0.96, 0.98)**                     | 1.01 (1.00, 1.02)**                         |
| <b>Substitution model C :<br/>Light PA is dropped</b>                                                                              |                     |                     |                             |                                         |                                             |
| Crude model                                                                                                                        | 0.99 (0.98, 1.00)   | 1.01 (1.00, 1.02)   | Dropped                     | 0.96 (0.95, 0.97)**                     | 1.00 (0.99, 1.01)                           |
| Multivariable model 1 <sup>d</sup>                                                                                                 | 0.99 (0.98, 1.00)   | 1.00 (0.99, 1.01)   | Dropped                     | 0.97 (0.95, 0.99)**                     | 1.00 (0.99, 1.02)                           |
| Multivariable model 2 <sup>e</sup>                                                                                                 | 0.99 (0.98, 1.00)   | 1.00 (0.99, 1.01)   | Dropped                     | 0.97 (0.95, 0.99)**                     | 1.00 (0.99, 1.02)                           |
| <b>Substitution model D:<br/>Moderate-vigorous PA is dropped</b>                                                                   |                     |                     |                             |                                         |                                             |
| Crude model                                                                                                                        | 1.04 (1.02, 1.06)** | 1.05 (1.04, 1.06)** | 1.04 (1.02, 1.06)**         | Dropped                                 | 0.96 (0.95, 0.97)**                         |
| Multivariable model 1 <sup>d</sup>                                                                                                 | 1.03 (1.02, 1.05)** | 1.04 (1.02, 1.05)** | 1.03 (1.02, 1.05)**         | Dropped                                 | 0.97 (0.96, 0.98)**                         |
| Multivariable model 2 <sup>e</sup>                                                                                                 | 1.03 (1.02, 1.05)** | 1.04 (1.02, 1.05)** | 1.03 (1.02, 1.05)**         | Dropped                                 | 0.97 (0.96, 0.98)**                         |

Abbreviations: CI, confidence interval; RR, Relative Risk; PA, physical activity. <sup>a</sup>Abdominal obesity is defined as waist circumference  $\geq 88$  cm in women or  $\geq 102$  cm in men. <sup>b</sup>Light PA (<4.0 METs) includes leisurely stroll or walk. Moderate-vigorous PA ( $\geq 4.0$  METs) includes faster walking, cross country walking, stair climbing, working in the garden, guided exercises and outdoor sports or at home or at the gym. <sup>c</sup>Total discretionary time= sum of time spent in sleeping, TV-watching, light PA and moderate-vigorous PA. The coefficient for total discretionary time represents the omitted activity component (e.g. sleeping for substitution model A, TV-watching for substitution model B and so on). <sup>d</sup>Multivariable-adjusted model for age (continuous), gender, education level (illiterate/primary education, secondary education and academic/graduate), smoking status (never smoker, past smoker and current smoker), marital status (single/divorced, married and widower), familiar history of coronary heart disease (yes or no) and Mediterranean diet adherence (<8 or  $\geq 9$  items). <sup>e</sup>Multivariable-adjusted model for variables in model 1 plus the other four metabolic syndrome individuals components. All models were stratified by recruiting center. \*P<0.05, \*\* P<0.01.

**S1 Table 4. Multivariable-adjusted RR (95% CI) for high blood pressure<sup>a</sup> per 60-min/day substitution in sleeping, watching TV and PA**

| <b>Substitution Model</b><br>(Substitution of 60 min/day of an activity to replace 60 min/day for one of the remaining activities) | <b>Sleeping</b>   | <b>TV-watching</b>  | <b>Light PA<sup>b</sup></b> | <b>Moderate-vigorous PA<sup>b</sup></b> | <b>Total discretionary time<sup>c</sup></b> |
|------------------------------------------------------------------------------------------------------------------------------------|-------------------|---------------------|-----------------------------|-----------------------------------------|---------------------------------------------|
| <b>Substitution model A :<br/>Sleeping is dropped</b>                                                                              |                   |                     |                             |                                         |                                             |
| Crude model                                                                                                                        | Dropped           | 1.00 (0.99, 1.01)   | 1.01 (0.99, 1.03)           | 0.99 (0.98, 1.00)                       | 1.00 (0.99, 1.01)                           |
| Multivariable model 1 <sup>d</sup>                                                                                                 | Dropped           | 1.00 (0.99, 1.01)   | 1.00 (0.99, 1.01)           | 0.99 (0.97, 1.01)                       | 1.00 (0.99, 1.01)                           |
| Multivariable model 2 <sup>e</sup>                                                                                                 | Dropped           | 1.00 (0.99, 1.01)   | 1.00 (0.99, 1.01)           | 0.99 (0.98, 1.00)                       | 1.00 (0.99, 1.01)                           |
| <b>Substitution model B :<br/>TV-Watching is dropped</b>                                                                           |                   |                     |                             |                                         |                                             |
| Crude model                                                                                                                        | 0.99 (0.98, 1.00) | Dropped             | 1.00 (0.99, 1.01)           | 1.03 (1.01, 1.05)*                      | 1.01 (1.00, 1.02)                           |
| Multivariable model 1 <sup>d</sup>                                                                                                 | 0.99 (0.98, 1.00) | Dropped             | 1.00 (0.99, 1.01)           | 1.01 (0.99, 1.03)                       | 1.01 (1.00, 1.02)                           |
| Multivariable model 2 <sup>e</sup>                                                                                                 | 0.99 (0.97, 1.01) | Dropped             | 1.00 (0.99, 1.01)           | 1.01 (0.99, 1.03)                       | 1.01 (1.00, 1.02)                           |
| <b>Substitution model C :<br/>Light PA is dropped</b>                                                                              |                   |                     |                             |                                         |                                             |
| Crude model                                                                                                                        | 0.99 (0.97, 1.01) | 0.99 (0.98, 1.00)   | Dropped                     | 1.00 (0.99, 1.01)                       | 1.00 (0.99, 1.01)                           |
| Multivariable model 1 <sup>d</sup>                                                                                                 | 0.99 (0.97, 1.01) | 1.00 (0.98, 1.02)   | Dropped                     | 0.99 (0.98, 1.00)                       | 1.00 (0.99, 1.01)                           |
| Multivariable model 2 <sup>e</sup>                                                                                                 | 0.99 (0.98, 1.00) | 1.00 (0.99, 1.01)   | Dropped                     | 0.99 (0.98, 1.00)                       | 1.01 (1.00, 1.02)                           |
| <b>Substitution model D:<br/>Moderate-vigorous PA is dropped</b>                                                                   |                   |                     |                             |                                         |                                             |
| Crude model                                                                                                                        | 1.00 (0.99, 1.01) | 0.97 (0.96, 0.98)** | 1.01 (1.00, 1.02)           | Dropped                                 | 1.03(1.01, 1.05)**                          |
| Multivariable model 1 <sup>d</sup>                                                                                                 | 1.01 (0.99, 1.02) | 0.99 (0.96, 1.02)   | 1.01 (0.99, 1.03)           | Dropped                                 | 1.00 (0.99, 1.01)                           |
| Multivariable model 2 <sup>e</sup>                                                                                                 | 1.00 (0.98, 1.02) | 0.99 (0.97, 1.01)   | 1.01 (1.00, 1.02)           | Dropped                                 | 0.99 (0.98, 1.00)                           |

Abbreviations: CI, confidence interval; RR, Relative Risk; PA, physical activity. <sup>a</sup>High blood pressure is defined as systolic and/or diastolic blood pressure  $\geq 130/85$  mmHg or use of antihypertensive medication. <sup>b</sup>Light PA (<4.0 METs) includes leisurely stroll or walk. Moderate-vigorous PA ( $\geq 4.0$  METs) includes faster walking, cross country walking, stair climbing, working in the garden, guided exercises and outdoor sports or at home or at the gym. <sup>c</sup>Total discretionary time= sum of time spent in sleeping, TV-watching, light PA and moderate-vigorous PA. The coefficient for total discretionary time represents the omitted activity component (e.g. sleeping for substitution model A, TV-watching for substitution model B and so on). <sup>d</sup>Multivariable-adjusted model for age (continuous), gender, education level (illiterate/primary education, secondary education and academic/graduate), smoking status (never smoker, past smoker and current smoker), marital status (single/divorced, married and widower), familiar history of coronary heart disease (yes or no) and Mediterranean diet adherence (<8 or  $\geq 9$  items). <sup>e</sup>Multivariable-adjusted model for variables in model 1 plus the other four metabolic syndrome individuals components. All models were stratified by recruiting center. \* P<0.05, \*\* P<0.01..

**S1 Table 5. Multivariable-adjusted RR (95% CI) for hyperglycemia<sup>a</sup> per 60-min/day substitution in sleeping, watching TV and PA**

| <b>Substitution Model</b><br>(Substitution of 60 min/day of an activity to replace 60 min/day for one of the remaining activities) | <b>Sleeping</b>   | <b>TV-watching</b> | <b>Light PA<sup>b</sup></b> | <b>Moderate-vigorous PA<sup>b</sup></b> | <b>Total discretionary time<sup>c</sup></b> |
|------------------------------------------------------------------------------------------------------------------------------------|-------------------|--------------------|-----------------------------|-----------------------------------------|---------------------------------------------|
| <b>Substitution model A :<br/>Sleeping is dropped</b>                                                                              |                   |                    |                             |                                         |                                             |
| Crude model                                                                                                                        | Dropped           | 1.00 (0.98, 1.02)  | 1.03 (1.00, 1.06)           | 0.99 (0.96, 1.02)                       | 1.01 (1.00, 1.02)                           |
| Multivariable model 1 <sup>d</sup>                                                                                                 | Dropped           | 1.00 (0.98, 1.02)  | 1.02 (0.99, 1.05)           | 0.98 (0.95, 1.01)                       | 1.01 (1.00, 1.02)                           |
| Multivariable model 2 <sup>e</sup>                                                                                                 | Dropped           | 1.00 (0.98, 1.02)  | 1.02 (0.99, 1.05)           | 0.98 (0.95, 1.01)                       | 1.01 (1.00, 1.02)                           |
| <b>Substitution model B :<br/>TV-Watching is dropped</b>                                                                           |                   |                    |                             |                                         |                                             |
| Crude model                                                                                                                        | 0.99 (0.98, 1.01) | Dropped            | 1.02 (0.99, 1.05)           | 0.99 (0.97, 1.01)                       | 1.01 (1.00, 1.02)                           |
| Multivariable model 1 <sup>d</sup>                                                                                                 | 1.00 (0.98, 1.02) | Dropped            | 1.02 (0.99, 1.05)           | 0.98 (0.96, 1.00)                       | 1.00 (0.99, 1.01)                           |
| Multivariable model 2 <sup>e</sup>                                                                                                 | 1.00 (0.98, 1.02) | Dropped            | 1.02 (0.99, 1.05)           | 0.98 (0.96, 1.00)                       | 1.01 (1.00, 1.02)                           |
| <b>Substitution model C :<br/>Light PA is dropped</b>                                                                              |                   |                    |                             |                                         |                                             |
| Crude model                                                                                                                        | 0.97 (0.94, 1.00) | 0.98 (0.95, 1.01)  | Dropped                     | 0.96 (0.93, 0.99)*                      | 1.03 (1.01, 1.05)*                          |
| Multivariable model 1 <sup>d</sup>                                                                                                 | 0.98 (0.95, 1.01) | 0.98 (0.95, 1.01)  | Dropped                     | 0.96 (0.93, 0.99)*                      | 1.03 (1.00, 1.06)                           |
| Multivariable model 2 <sup>e</sup>                                                                                                 | 0.98 (0.95, 1.01) | 0.98 (0.95, 1.01)  | Dropped                     | 0.96 (0.93, 0.99)*                      | 1.03 (1.00, 1.06)                           |
| <b>Substitution model D:<br/>Moderate-vigorous PA is dropped</b>                                                                   |                   |                    |                             |                                         |                                             |
| Crude model                                                                                                                        | 1.01 (0.98, 1.04) | 1.01 (0.98, 1.04)  | 1.03 (1.01, 1.05)*          | Dropped                                 | 1.00 (0.98, 1.02)                           |
| Multivariable model 1 <sup>d</sup>                                                                                                 | 1.02 (0.99, 1.05) | 1.02 (0.99, 1.05)  | 1.04 (1.01, 1.07)*          | Dropped                                 | 0.98 (0.96, 1.00)                           |
| Multivariable model 2 <sup>e</sup>                                                                                                 | 1.02 (0.99, 1.05) | 1.02 (0.99, 1.05)  | 1.04 (1.01, 1.07)*          | Dropped                                 | 0.98 (0.96, 1.00)                           |

Abbreviations: CI, confidence interval; RR, Relative Risk; PA, physical activity. <sup>a</sup>Hyperglycemia is defined as fasting plasma glucose  $\geq 5.5$  mmol/L or  $\geq 100$  mg/dL) or the use of medication for elevated glucose levels. <sup>b</sup>Light PA (<4.0 METs) includes leisurely stroll or walk. Moderate-vigorous PA ( $\geq 4.0$  METs) includes faster walking, cross country walking, stair climbing, working in the garden, guided exercises and outdoor sports or at home or at the gym. <sup>c</sup>Total discretionary time= sum of time spent in sleeping, TV-watching, light PA and moderate-vigorous PA. The coefficient for total discretionary time represents the omitted activity component (e.g. sleeping for substitution model A, TV-watching for substitution model B and so on). <sup>d</sup>Multivariable-adjusted model for age (continuous), gender, education level (illiterate/primary education, secondary education and academic/graduate), smoking status (never smoker, past smoker and current smoker), marital status (single/divorced, married and widower), familiar history of coronary heart disease (yes or no) and Mediterranean diet adherence (<8 or  $\geq 9$  items). <sup>e</sup>Multivariable-adjusted model for variables in model 1 plus the other four metabolic syndrome individuals components. All models were stratified by recruiting center. \*P<0.05, \*\* P<0.01.

**S1 Table 6. Multivariable-adjusted RR (95% CI) for hypertriglyceridemia<sup>a</sup> per 60-min/day substitution in sleeping, watching TV and PA**

| <b>Substitution Model</b><br>(Substitution of 60 min/day of an activity to replace 60 min/day for one of the remaining activities) | <b>Sleeping</b>     | <b>TV-watching</b>  | <b>Light PA<sup>b</sup></b> | <b>Moderate-vigorous PA<sup>b</sup></b> | <b>Total discretionary time<sup>c</sup></b> |
|------------------------------------------------------------------------------------------------------------------------------------|---------------------|---------------------|-----------------------------|-----------------------------------------|---------------------------------------------|
| <b>Substitution model A :<br/>Sleeping is dropped</b>                                                                              |                     |                     |                             |                                         |                                             |
| Crude model                                                                                                                        | Dropped             | 1.00 (0.97, 1.03)   | 0.97 (0.91, 1.03)           | 0.92 (0.87, 0.97)**                     | 1.02 (1.00, 1.04)                           |
| Multivariable model 1 <sup>d</sup>                                                                                                 | Dropped             | 1.01 (0.98, 1.04)   | 0.98 (0.92, 1.04)           | 0.93 (0.88, 0.98)**                     | 1.02 (0.99, 1.05)                           |
| Multivariable model 2 <sup>e</sup>                                                                                                 | Dropped             | 1.02 (0.98, 1.06)   | 0.99 (0.93, 1.05)           | 0.94 (0.89, 0.99)*                      | 1.01 (0.98, 1.04)                           |
| <b>Substitution model B :<br/>TV-Watching is dropped</b>                                                                           |                     |                     |                             |                                         |                                             |
| Crude model                                                                                                                        | 0.99 (0.96, 1.01)   | Dropped             | 0.97 (0.91, 1.03)           | 0.92 (0.88, 0.96)**                     | 1.01 (0.99, 1.03)                           |
| Multivariable model 1 <sup>d</sup>                                                                                                 | 0.98 (0.95, 1.01)   | Dropped             | 0.97 (0.91, 1.03)           | 0.92 (0.88, 0.96)**                     | 1.03 (1.01, 1.05)**                         |
| Multivariable model 2 <sup>e</sup>                                                                                                 | 0.98 (0.95, 1.01)   | Dropped             | 0.97 (0.91, 1.03)           | 0.94 (0.90, 0.98)**                     | 1.03 (1.01, 1.05)*                          |
| <b>Substitution model C :<br/>Light PA is dropped</b>                                                                              |                     |                     |                             |                                         |                                             |
| Crude model                                                                                                                        | 1.03 (0.96, 1.10)   | 1.03 (0.97, 1.09)   | Dropped                     | 0.95 (0.88, 1.02)                       | 0.99 (0.93, 1.05)                           |
| Multivariable model 1 <sup>d</sup>                                                                                                 | 1.01 (0.95, 1.07)   | 1.03 (0.97, 1.09)   | Dropped                     | 0.95 (0.89, 1.01)                       | 1.00 (0.94, 1.06)                           |
| Multivariable model 2 <sup>e</sup>                                                                                                 | 1.01 (0.95, 1.07)   | 1.03 (0.97, 1.09)   | Dropped                     | 0.95 (0.88, 1.02)                       | 1.00 (0.94, 1.06)                           |
| <b>Substitution model D:<br/>Moderate-vigorous PA is dropped</b>                                                                   |                     |                     |                             |                                         |                                             |
| Crude model                                                                                                                        | 1.08 (1.03, 1.13)** | 1.09 (1.04, 1.14)** | 1.06 (0.98, 1.13)           | Dropped                                 | 0.93 (0.89, 0.97)**                         |
| Multivariable model 1 <sup>d</sup>                                                                                                 | 1.07 (1.02, 1.12)** | 1.07 (1.03, 1.11)** | 1.06 (0.99, 1.13)           | Dropped                                 | 0.94 (0.89, 0.99)*                          |
| Multivariable model 2 <sup>e</sup>                                                                                                 | 1.06 (1.01, 1.11)*  | 1.06 (1.01, 1.11)** | 1.05 (0.97, 1.13)           | Dropped                                 | 0.95 (0.90, 1.00)                           |

Abbreviations: CI, confidence interval; RR, Relative Risk; PA, physical activity. <sup>a</sup>Hypertriglyceridemia is defined as plasma triglycerides concentrations  $\geq 1.7$  mmol/L or  $\geq 150$  mg/dL, or the use of hypolipidemic agents (fibrates). <sup>b</sup>Light PA (<4.0 METs) includes leisurely stroll or walk. Moderate-vigorous PA ( $\geq 4.0$  METs) includes faster walking, cross country walking, stair climbing, working in the garden, guided exercises and outdoor sports or at home or at the gym. <sup>c</sup>Total discretionary time= sum of time spent in sleeping, TV-watching, light PA and moderate-vigorous PA. The coefficient for total discretionary time represents the omitted activity component (e.g. sleeping for substitution model A, TV-watching for substitution model B and so on). <sup>d</sup>Multivariable-adjusted model for age (continuous), gender, education level (illiterate/primary education, secondary education and academic/graduate), smoking status (never smoker, past smoker and current smoker), marital status (single/divorced, married and widower), familiar history of coronary heart disease (yes or no) and Mediterranean diet adherence (<8 or  $\geq 9$  items). <sup>e</sup>Multivariable-adjusted model for variables in model 1 plus the other four metabolic syndrome individuals components. All models were stratified by recruiting center.\*P<0.05, \*\* P<0.01.

**S1 Table 7 Multivariable-adjusted RR (95% CI) for low-HDL-c<sup>a</sup> per 60-min/day substitution in sleeping, watching TV and PA**

| <b>Substitution Model</b><br>(Substitution of 60 min/day of an activity to replace 60 min/day for one of the remaining activities) | <b>Sleeping</b>     | <b>TV-watching</b>  | <b>Light PA<sup>b</sup></b> | <b>Moderate-vigorous PA<sup>b</sup></b> | <b>Total discretionary time<sup>c</sup></b> |
|------------------------------------------------------------------------------------------------------------------------------------|---------------------|---------------------|-----------------------------|-----------------------------------------|---------------------------------------------|
| <b>Substitution model A :<br/>Sleeping is dropped</b>                                                                              |                     |                     |                             |                                         |                                             |
| Crude model                                                                                                                        | Dropped             | 0.98 (0.95, 1.01)   | 0.96 (0.89, 1.02)           | 0.89 (0.84, 0.94)**                     | 1.03 (1.00, 1.06)                           |
| Multivariable model 1 <sup>d</sup>                                                                                                 | Dropped             | 0.97 (0.94, 1.00)   | 0.97 (0.90, 1.04)           | 0.91 (0.86, 0.96)**                     | 1.02 (0.99, 1.05)                           |
| Multivariable model 2 <sup>e</sup>                                                                                                 | Dropped             | 0.97 (0.94, 1.00)   | 0.97 (0.90, 1.04)           | 0.92 (0.87, 0.97)**                     | 1.02 (0.99, 1.04)                           |
| <b>Substitution model B :<br/>TV-Watching is dropped</b>                                                                           |                     |                     |                             |                                         |                                             |
| Crude model                                                                                                                        | 1.01 (0.98, 1.04)   | Dropped             | 0.97 (0.91, 1.03)           | 0.87 (0.84, 0.90)**                     | 1.01 (0.99, 1.03)                           |
| Multivariable model 1 <sup>d</sup>                                                                                                 | 1.02 (0.99, 1.05)   | Dropped             | 0.99 (0.93, 1.05)           | 0.92 (0.88, 0.96)**                     | 1.01 (0.99, 1.03)                           |
| Multivariable model 2 <sup>e</sup>                                                                                                 | 1.03 (1.00, 1.06)   | Dropped             | 0.99 (0.93, 1.05)           | 0.94 (0.90, 0.98)*                      | 1.01 (0.98, 1.03)                           |
| <b>Substitution model C :<br/>Light PA is dropped</b>                                                                              |                     |                     |                             |                                         |                                             |
| Crude model                                                                                                                        | 1.04 (0.96, 1.12)   | 1.03 (0.96, 1.10)   | Dropped                     | 0.89 (0.83, 0.95)**                     | 0.98 (0.92, 1.04)                           |
| Multivariable model 1 <sup>d</sup>                                                                                                 | 1.03 (0.96, 1.10)   | 1.01 (0.94, 1.08)   | Dropped                     | 0.90 (0.84, 0.96)**                     | 1.00 (0.94, 1.06)                           |
| Multivariable model 2 <sup>e</sup>                                                                                                 | 1.04 (0.97, 1.11)   | 1.01 (0.95, 1.07)   | Dropped                     | 0.92 (0.86, 0.98)**                     | 0.99 (0.93, 1.05)                           |
| <b>Substitution model D:<br/>Moderate-vigorous PA is dropped</b>                                                                   |                     |                     |                             |                                         |                                             |
| Crude model                                                                                                                        | 1.13 (1.07, 1.19)** | 1.14 (1.09, 1.19)** | 1.12 (1.05, 1.19)**         | Dropped                                 | 0.89 (0.85, 0.94)**                         |
| Multivariable model 1 <sup>d</sup>                                                                                                 | 1.10 (1.04, 1.16)** | 1.08 (1.03, 1.13)** | 1.10 (1.02, 1.18)**         | Dropped                                 | 0.93 (0.88, 0.98)**                         |
| Multivariable model 2 <sup>e</sup>                                                                                                 | 1.08 (1.02, 1.14)** | 1.06 (1.01, 1.11)** | 1.09 (1.02, 1.16)*          | Dropped                                 | 0.95 (0.91, 0.99)**                         |

Abbreviations: CI, confidence interval; RR, Relative Risk; PA, physical activity; HDL-c, high density lipoprotein-cholesterol. <sup>a</sup>Low HDL-c is defined as plasma HDL-c concentrations  $\leq 40$  mg/dL or  $\leq 1.03$  mmol/L in men or  $\leq 50$  mg/dL or  $\leq 1.3$  mmol/L in women or the use of hypolipidemic agents. <sup>b</sup>Light PA ( $< 4.0$  METs) includes leisurely stroll or walk. Moderate-vigorous PA ( $\geq 4.0$  METs) includes faster walking, cross country walking, stair climbing, working in the garden, guided exercises and outdoor sports or at home or at the gym. <sup>c</sup>Total discretionary time= sum of time spent in sleeping, TV-watching, light PA and moderate-vigorous PA. The coefficient for total discretionary time represents the omitted activity component (e.g. sleeping for substitution model A, TV-watching for substitution model B and so on). <sup>d</sup>Multivariable-adjusted model for age (continuous), gender, education level (illiterate/primary education, secondary education and academic/graduate), smoking status (never smoker, past smoker and current smoker), marital status (single/divorced, married and widower), familiar history of coronary heart disease (yes or no) and Mediterranean diet adherence ( $< 8$  or  $\geq 9$  items). <sup>e</sup>Multivariable-adjusted model for variables in model 1 plus the other four metabolic syndrome individuals components. All models were stratified by recruiting center.

\* P<0.05, \*\* P<0.01.
